# Supplementary material for: Performance of A1C for the Classification and Prediction of Diabetes
Source: Oxford University Press journal article supplement (doi:10.2337/dc10-1235), 2010-09-21
Supplement: dc101235nlineappendix.pdf [file dc101235nlineappendix.pdf]

## The Atherosclerosis Risk in Communities (ARIC) Study

### Sensitivity, specificity, likelihood ratio positive, and likelihood ratio negative for HbA1c cut-points

#### Prevalent Diabetes: Definition 1

| Cutpoint | Sensitivity | Specificity | LR+      | LR-    |
|----------|-------------|-------------|----------|--------|
| 3.5      | 100.00%     | 0.00%       | 1        |        |
| 3.6      | 100.00%     | 0.03%       | 1.0003   | 0      |
| 3.7      | 100.00%     | 0.04%       | 1.0004   | 0      |
| 3.9      | 100.00%     | 0.06%       | 1.0006   | 0      |
| 4.0      | 100.00%     | 0.08%       | 1.0008   | 0      |
| 4.1      | 100.00%     | 0.11%       | 1.0011   | 0      |
| 4.2      | 100.00%     | 0.14%       | 1.0014   | 0      |
| 4.3      | 100.00%     | 0.23%       | 1.0023   | 0      |
| 4.4      | 100.00%     | 0.40%       | 1.004    | 0      |
| 4.5      | 100.00%     | 0.54%       | 1.0054   | 0      |
| 4.6      | 100.00%     | 0.93%       | 1.0094   | 0      |
| 4.7      | 99.88%      | 1.61%       | 1.0152   | 0.0737 |
| 4.8      | 99.52%      | 2.84%       | 1.0244   | 0.1675 |
| 4.9      | 99.29%      | 5.07%       | 1.0458   | 0.141  |
| 5.0      | 98.81%      | 8.86%       | 1.0842   | 0.1343 |
| 5.1      | 97.98%      | 14.55%      | 1.1466   | 0.1391 |
| 5.2      | 97.02%      | 22.28%      | 1.2483   | 0.1336 |
| 5.3      | 96.31%      | 31.64%      | 1.4088   | 0.1167 |
| 5.4      | 94.05%      | 43.40%      | 1.6616   | 0.1371 |
| 5.5      | 91.19%      | 55.41%      | 2.0453   | 0.159  |
| 5.6      | 91.07%      | 63.19%      | 2.4744   | 0.1413 |
| 5.7      | 87.38%      | 72.14%      | 3.1367   | 0.1749 |
| 5.8      | 83.57%      | 79.86%      | 4.1501   | 0.2057 |
| 5.9      | 79.52%      | 85.45%      | 5.4667   | 0.2396 |
| 6.0      | 74.88%      | 90.13%      | 7.5891   | 0.2787 |
| 6.1      | 69.64%      | 93.45%      | 10.629   | 0.3249 |
| 6.2      | 63.10%      | 95.55%      | 14.1843  | 0.3862 |
| 6.3      | 57.02%      | 96.95%      | 18.7054  | 0.4433 |
| 6.4      | 52.14%      | 97.91%      | 24.9878  | 0.4888 |
| 6.5      | 47.14%      | 98.59%      | 33.4742  | 0.5361 |
| 6.6      | 43.10%      | 99.06%      | 46.0406  | 0.5744 |
| 6.7      | 38.33%      | 99.37%      | 61.1497  | 0.6206 |
| 6.8      | 33.21%      | 99.52%      | 69.0686  | 0.6711 |
| 6.9      | 29.76%      | 99.66%      | 86.6435  | 0.7048 |
| 7.0      | 27.38%      | 99.74%      | 106.2835 | 0.7281 |
| 7.1      | 23.93%      | 99.81%      | 126.6604 | 0.7622 |
| 7.2      | 20.71%      | 99.85%      | 134.011  | 0.7941 |

|      |        |        |          |        |
|------|--------|--------|----------|--------|
| 7.3  | 18.81% | 99.89% | 168.4938 | 0.8128 |
| 7.4  | 16.67% | 99.92% | 215.6499 | 0.834  |
| 7.5  | 14.88% | 99.93% | 216.5992 | 0.8518 |
| 7.6  | 13.93% | 99.93% | 202.7369 | 0.8613 |
| 7.7  | 12.86% | 99.93% | 187.1418 | 0.872  |
| 7.8  | 12.26% | 99.93% | 178.4778 | 0.878  |
| 7.9  | 11.55% | 99.93% | 168.081  | 0.8851 |
| 8.0  | 11.43% | 99.93% | 166.3482 | 0.8863 |
| 8.1  | 10.83% | 99.94% | 180.2191 | 0.8922 |
| 8.2  | 10.60% | 99.94% | 176.2583 | 0.8946 |
| 8.3  | 9.40%  | 99.94% | 156.454  | 0.9065 |
| 8.4  | 9.05%  | 99.94% | 150.5127 | 0.9101 |
| 8.5  | 8.81%  | 99.94% | 146.5518 | 0.9125 |
| 8.6  | 8.57%  | 99.95% | 166.3667 | 0.9148 |
| 8.7  | 8.21%  | 99.96% | 191.3047 | 0.9183 |
| 8.8  | 7.86%  | 99.96% | 182.9871 | 0.9218 |
| 8.9  | 7.50%  | 99.96% | 174.6695 | 0.9254 |
| 9.0  | 7.02%  | 99.96% | 163.5794 | 0.9302 |
| 9.1  | 6.90%  | 99.96% | 160.8069 | 0.9314 |
| 9.2  | 6.55%  | 99.96% | 152.4893 | 0.9349 |
| 9.3  | 6.43%  | 99.96% | 149.7167 | 0.9361 |
| 9.5  | 6.31%  | 99.96% | 146.9442 | 0.9373 |
| 9.7  | 6.07%  | 99.96% | 141.3991 | 0.9397 |
| 9.8  | 5.48%  | 99.96% | 127.5365 | 0.9456 |
| 9.9  | 5.24%  | 99.96% | 121.9914 | 0.948  |
| 10.0 | 5.00%  | 99.96% | 116.4463 | 0.9504 |
| 10.1 | 4.52%  | 99.96% | 105.3562 | 0.9552 |
| 10.3 | 4.17%  | 99.96% | 97.0386  | 0.9587 |
| 10.4 | 3.81%  | 99.97% | 110.9111 | 0.9622 |
| 10.5 | 3.45%  | 99.98% | 201.0264 | 0.9656 |
| 10.6 | 3.21%  | 99.98% | 187.1625 | 0.968  |
| 10.8 | 2.86%  | 99.98% | 166.3667 | 0.9716 |
| 10.9 | 2.62%  | 99.98% | 152.5028 | 0.974  |
| 11.0 | 2.26%  | 99.98% | 131.707  | 0.9775 |
| 11.2 | 2.14%  | 99.99% | 249.4392 | 0.9787 |
| 11.3 | 2.02%  | 99.99% | 235.5815 | 0.9798 |
| 11.5 | 1.90%  | 99.99% | 221.7238 | 0.981  |
| 11.8 | 1.79%  | 99.99% | 207.866  | 0.9822 |
| 11.9 | 1.67%  | 99.99% | 194.0083 | 0.9834 |
| 12.1 | 1.55%  | 99.99% | 180.1506 | 0.9846 |
| 12.2 | 1.43%  | 99.99% | 166.2928 | 0.9858 |
| 12.7 | 1.31%  | 99.99% | 152.4351 | 0.987  |
| 12.8 | 1.19%  | 99.99% | 138.5773 | 0.9882 |
| 12.9 | 1.07%  | 99.99% | 124.7196 | 0.9894 |

|      |       |         |         |        |
|------|-------|---------|---------|--------|
| 13.0 | 0.83% | 99.99%  | 97.0041 | 0.9918 |
| 13.5 | 0.60% | 99.99%  | 69.2887 | 0.9941 |
| 13.6 | 0.48% | 100.00% | 0.9952  |        |
| 14.0 | 0.24% | 100.00% | 0.9976  |        |
| 15.7 | 0.12% | 100.00% | 0.9988  |        |
| 15.7 | 0.00% | 100.00% | 1       |        |

**Prevalent Diabetes: Definition 2**

| <b>Cutpoint</b> | <b>Sensitivity</b> | <b>Specificity</b> | <b>LR+</b> | <b>LR-</b> |
|-----------------|--------------------|--------------------|------------|------------|
| 3.5             | 100.00%            | 0.00%              | 1          |            |
| 3.6             | 100.00%            | 0.03%              | 1.0003     | 0          |
| 3.7             | 100.00%            | 0.04%              | 1.0004     | 0          |
| 3.9             | 100.00%            | 0.06%              | 1.0006     | 0          |
| 4.0             | 100.00%            | 0.08%              | 1.0008     | 0          |
| 4.1             | 100.00%            | 0.11%              | 1.0011     | 0          |
| 4.2             | 100.00%            | 0.13%              | 1.0013     | 0          |
| 4.3             | 100.00%            | 0.23%              | 1.0023     | 0          |
| 4.4             | 100.00%            | 0.39%              | 1.0039     | 0          |
| 4.5             | 100.00%            | 0.53%              | 1.0053     | 0          |
| 4.6             | 100.00%            | 0.86%              | 1.0087     | 0          |
| 4.7             | 100.00%            | 1.53%              | 1.0156     | 0          |
| 4.8             | 100.00%            | 2.69%              | 1.0276     | 0          |
| 4.9             | 100.00%            | 4.81%              | 1.0505     | 0          |
| 5.0             | 100.00%            | 8.49%              | 1.0928     | 0          |
| 5.1             | 100.00%            | 13.96%             | 1.1622     | 0          |
| 5.2             | 99.57%             | 21.46%             | 1.2678     | 0.0199     |
| 5.3             | 99.57%             | 30.46%             | 1.4318     | 0.014      |
| 5.4             | 98.29%             | 41.84%             | 1.6899     | 0.0409     |
| 5.5             | 97.44%             | 53.40%             | 2.0909     | 0.048      |
| 5.6             | 97.44%             | 60.82%             | 2.4868     | 0.0422     |
| 5.7             | 94.87%             | 69.54%             | 3.1142     | 0.0737     |
| 5.8             | 91.88%             | 77.06%             | 4.006      | 0.1054     |
| 5.9             | 88.46%             | 82.58%             | 5.0789     | 0.1397     |
| 6.0             | 84.62%             | 87.25%             | 6.6348     | 0.1763     |
| 6.1             | 81.20%             | 90.70%             | 8.7277     | 0.2073     |
| 6.2             | 77.35%             | 93.07%             | 11.156     | 0.2434     |
| 6.3             | 71.37%             | 94.68%             | 13.4216    | 0.3024     |
| 6.4             | 69.23%             | 95.85%             | 16.7021    | 0.321      |
| 6.5             | 66.67%             | 96.80%             | 20.8412    | 0.3443     |
| 6.6             | 62.39%             | 97.43%             | 24.2703    | 0.386      |
| 6.7             | 58.12%             | 97.97%             | 28.5623    | 0.4275     |
| 6.8             | 53.42%             | 98.35%             | 32.382     | 0.4736     |
| 6.9             | 49.15%             | 98.64%             | 36.2281    | 0.5155     |
| 7.0             | 46.15%             | 98.83%             | 39.3692    | 0.5448     |

|      |        |        |          |        |
|------|--------|--------|----------|--------|
| 7.1  | 41.45% | 99.02% | 42.3104  | 0.5913 |
| 7.2  | 38.46% | 99.20% | 48.3479  | 0.6203 |
| 7.3  | 37.18% | 99.35% | 56.9225  | 0.6323 |
| 7.4  | 34.62% | 99.47% | 65.6154  | 0.6573 |
| 7.5  | 32.48% | 99.56% | 73.1815  | 0.6782 |
| 7.6  | 29.91% | 99.56% | 68.7007  | 0.7039 |
| 7.7  | 28.63% | 99.61% | 74.3328  | 0.7164 |
| 7.8  | 27.35% | 99.63% | 74.2318  | 0.7292 |
| 7.9  | 26.50% | 99.67% | 79.1027  | 0.7375 |
| 8.0  | 26.07% | 99.67% | 77.8269  | 0.7418 |
| 8.1  | 25.21% | 99.70% | 83.6406  | 0.7501 |
| 8.2  | 24.36% | 99.70% | 80.8053  | 0.7587 |
| 8.3  | 22.22% | 99.74% | 85.605   | 0.7798 |
| 8.4  | 20.94% | 99.74% | 80.6663  | 0.7927 |
| 8.5  | 20.51% | 99.75% | 81.6551  | 0.7969 |
| 8.6  | 20.09% | 99.77% | 85.6645  | 0.801  |
| 8.7  | 19.66% | 99.79% | 93.9039  | 0.8051 |
| 8.8  | 18.80% | 99.80% | 93.5652  | 0.8136 |
| 8.9  | 18.38% | 99.82% | 99.7469  | 0.8177 |
| 9.0  | 17.09% | 99.82% | 97.208   | 0.8305 |
| 9.1  | 16.67% | 99.82% | 94.7778  | 0.8348 |
| 9.2  | 15.81% | 99.83% | 94.4108  | 0.8433 |
| 9.3  | 15.81% | 99.84% | 99.3817  | 0.8432 |
| 9.5  | 15.38% | 99.84% | 96.6957  | 0.8475 |
| 9.7  | 14.96% | 99.85% | 99.2346  | 0.8517 |
| 9.8  | 13.68% | 99.87% | 102.0692 | 0.8644 |
| 9.9  | 13.68% | 99.88% | 116.6496 | 0.8643 |
| 10.0 | 13.25% | 99.88% | 113.0043 | 0.8685 |
| 10.1 | 11.54% | 99.88% | 98.4231  | 0.8857 |
| 10.3 | 10.68% | 99.89% | 98.1388  | 0.8941 |
| 10.4 | 9.83%  | 99.91% | 106.7104 | 0.9025 |
| 10.5 | 8.97%  | 99.92% | 119.0815 | 0.9109 |
| 10.6 | 8.55%  | 99.93% | 127.5938 | 0.9151 |
| 10.8 | 7.26%  | 99.93% | 108.4547 | 0.928  |
| 10.9 | 6.41%  | 99.93% | 95.6954  | 0.9365 |
| 11.0 | 5.13%  | 99.93% | 76.5563  | 0.9494 |
| 11.2 | 5.13%  | 99.95% | 102.075  | 0.9492 |
| 11.3 | 4.70%  | 99.95% | 93.5688  | 0.9535 |
| 11.5 | 4.27%  | 99.95% | 85.0625  | 0.9577 |
| 11.8 | 4.27%  | 99.96% | 102.0657 | 0.9577 |
| 11.9 | 3.85%  | 99.96% | 91.8592  | 0.9619 |
| 12.1 | 3.42%  | 99.96% | 81.6526  | 0.9662 |
| 12.2 | 3.42%  | 99.97% | 102.0518 | 0.9661 |
| 12.7 | 2.99%  | 99.97% | 89.2953  | 0.9704 |

|      |       |         |          |        |
|------|-------|---------|----------|--------|
| 12.8 | 2.56% | 99.97%  | 76.5388  | 0.9747 |
| 12.9 | 2.56% | 99.97%  | 102.0595 | 0.9746 |
| 13.0 | 1.71% | 99.97%  | 68.0397  | 0.9832 |
| 13.5 | 1.28% | 99.98%  | 76.5563  | 0.9873 |
| 13.6 | 0.85% | 99.98%  | 51.0375  | 0.9916 |
| 14.0 | 0.43% | 99.99%  | 51.0143  | 0.9958 |
| 15.7 | 0.43% | 100.00% | 0.9957   |        |
| 15.7 | 0.00% | 100.00% | 1        |        |

**Incident Diabetes: Definition A**

| <b>Cutpoint</b> | <b>Sensitivity</b> | <b>Specificity</b> | <b>LR+</b> | <b>LR-</b> |
|-----------------|--------------------|--------------------|------------|------------|
| 3.5             | 100.00%            | 0.00%              | 1          |            |
| 3.6             | 100.00%            | 0.04%              | 1.0004     | 0          |
| 3.7             | 100.00%            | 0.05%              | 1.0005     | 0          |
| 3.9             | 100.00%            | 0.07%              | 1.0007     | 0          |
| 4.0             | 100.00%            | 0.08%              | 1.0008     | 0          |
| 4.1             | 100.00%            | 0.12%              | 1.0012     | 0          |
| 4.2             | 100.00%            | 0.15%              | 1.0015     | 0          |
| 4.3             | 100.00%            | 0.25%              | 1.0025     | 0          |
| 4.4             | 99.92%             | 0.41%              | 1.0033     | 0.1868     |
| 4.5             | 99.77%             | 0.55%              | 1.0032     | 0.418      |
| 4.6             | 99.69%             | 0.95%              | 1.0065     | 0.3224     |
| 4.7             | 99.62%             | 1.69%              | 1.0133     | 0.2258     |
| 4.8             | 99.39%             | 3.01%              | 1.0248     | 0.203      |
| 4.9             | 98.85%             | 5.35%              | 1.0444     | 0.2144     |
| 5.0             | 98.09%             | 9.39%              | 1.0826     | 0.2035     |
| 5.1             | 96.56%             | 15.39%             | 1.1413     | 0.2235     |
| 5.2             | 94.72%             | 23.59%             | 1.2396     | 0.2237     |
| 5.3             | 92.20%             | 33.39%             | 1.3842     | 0.2336     |
| 5.4             | 88.61%             | 45.69%             | 1.6316     | 0.2493     |
| 5.5             | 82.95%             | 58.03%             | 1.9763     | 0.2938     |
| 5.6             | 82.80%             | 66.38%             | 2.4626     | 0.2591     |
| 5.7             | 77.14%             | 75.43%             | 3.1394     | 0.3031     |
| 5.8             | 70.11%             | 83.03%             | 4.1304     | 0.36       |
| 5.9             | 63.23%             | 88.40%             | 5.4516     | 0.416      |
| 6.0             | 54.97%             | 92.61%             | 7.4344     | 0.4863     |
| 6.1             | 47.25%             | 95.49%             | 10.4744    | 0.5524     |
| 6.2             | 39.98%             | 97.16%             | 14.0956    | 0.6177     |
| 6.3             | 33.64%             | 98.19%             | 18.5481    | 0.6759     |
| 6.4             | 28.59%             | 98.88%             | 25.6195    | 0.7221     |
| 6.5             | 24.08%             | 99.40%             | 39.8363    | 0.7638     |
| 6.6             | 20.34%             | 99.64%             | 56.0657    | 0.7995     |
| 6.7             | 16.90%             | 99.77%             | 72.6645    | 0.833      |
| 6.8             | 13.61%             | 99.80%             | 69.6758    | 0.8656     |

|      |        |         |          |        |
|------|--------|---------|----------|--------|
| 6.9  | 11.54% | 99.87%  | 88.664   | 0.8857 |
| 7.0  | 10.17% | 99.90%  | 99.3934  | 0.8992 |
| 7.1  | 8.56%  | 99.92%  | 102.2996 | 0.9151 |
| 7.2  | 6.88%  | 99.93%  | 105.6798 | 0.9318 |
| 7.3  | 5.73%  | 99.94%  | 102.7563 | 0.9432 |
| 7.4  | 4.51%  | 99.94%  | 80.835   | 0.9554 |
| 7.5  | 3.75%  | 99.94%  | 67.1341  | 0.9631 |
| 7.6  | 3.59%  | 99.94%  | 64.394   | 0.9646 |
| 7.7  | 3.13%  | 99.94%  | 56.1734  | 0.9692 |
| 7.8  | 2.98%  | 99.94%  | 53.4333  | 0.9707 |
| 8.0  | 2.68%  | 99.94%  | 47.9529  | 0.9738 |
| 8.2  | 2.45%  | 99.95%  | 52.6112  | 0.976  |
| 8.4  | 2.06%  | 99.95%  | 44.3907  | 0.9798 |
| 8.5  | 1.99%  | 99.95%  | 42.7466  | 0.9806 |
| 8.6  | 1.91%  | 99.96%  | 51.3676  | 0.9813 |
| 8.7  | 1.68%  | 99.96%  | 45.2035  | 0.9835 |
| 8.8  | 1.61%  | 99.96%  | 43.1488  | 0.9843 |
| 8.9  | 1.45%  | 99.96%  | 39.0394  | 0.9858 |
| 9.1  | 1.38%  | 99.96%  | 36.9847  | 0.9866 |
| 9.2  | 1.30%  | 99.96%  | 34.93    | 0.9874 |
| 9.5  | 1.22%  | 99.96%  | 32.8753  | 0.9881 |
| 9.7  | 1.15%  | 99.96%  | 30.8206  | 0.9889 |
| 9.8  | 0.99%  | 99.96%  | 26.7112  | 0.9904 |
| 10.1 | 0.84%  | 99.96%  | 22.6018  | 0.992  |
| 10.3 | 0.76%  | 99.96%  | 20.547   | 0.9927 |
| 10.4 | 0.69%  | 99.97%  | 24.6615  | 0.9934 |
| 10.5 | 0.61%  | 99.99%  | 65.764   | 0.994  |
| 11.0 | 0.54%  | 99.99%  | 57.5435  | 0.9947 |
| 11.5 | 0.46%  | 100.00% | 0.9954   |        |
| 12.1 | 0.38%  | 100.00% | 0.9962   |        |
| 12.8 | 0.31%  | 100.00% | 0.9969   |        |
| 13.0 | 0.23%  | 100.00% | 0.9977   |        |
| 13.6 | 0.15%  | 100.00% | 0.9985   |        |
| 14.0 | 0.08%  | 100.00% | 0.9992   |        |
| 14.0 | 0.00%  | 100.00% | 1        |        |

#### Incident Diabetes: Definition B

| Cutpoint | Sensitivity | Specificity | LR+    | LR-    |
|----------|-------------|-------------|--------|--------|
| 3.5      | 100.00%     | 0.00%       | 1      |        |
| 3.6      | 100.00%     | 0.04%       | 1.0004 | 0      |
| 3.7      | 100.00%     | 0.05%       | 1.0005 | 0      |
| 3.9      | 99.96%      | 0.06%       | 1.0002 | 0.6293 |
| 4.0      | 99.96%      | 0.08%       | 1.0004 | 0.472  |
| 4.1      | 99.96%      | 0.12%       | 1.0008 | 0.3147 |

|     |        |        |         |        |
|-----|--------|--------|---------|--------|
| 4.2 | 99.96% | 0.15%  | 1.0011  | 0.2517 |
| 4.3 | 99.92% | 0.25%  | 1.0018  | 0.3021 |
| 4.4 | 99.85% | 0.43%  | 1.0027  | 0.3596 |
| 4.5 | 99.77% | 0.58%  | 1.0035  | 0.3975 |
| 4.6 | 99.66% | 1.00%  | 1.0067  | 0.3433 |
| 4.7 | 99.35% | 1.74%  | 1.0111  | 0.3732 |
| 4.8 | 98.97% | 3.12%  | 1.0215  | 0.331  |
| 4.9 | 98.51% | 5.64%  | 1.044   | 0.2644 |
| 5.0 | 97.40% | 9.87%  | 1.0806  | 0.2636 |
| 5.1 | 94.84% | 15.97% | 1.1285  | 0.3235 |
| 5.2 | 91.20% | 24.20% | 1.2032  | 0.3636 |
| 5.3 | 86.76% | 34.13% | 1.3172  | 0.3878 |
| 5.4 | 80.03% | 46.42% | 1.4936  | 0.4302 |
| 5.5 | 72.26% | 58.78% | 1.7531  | 0.4719 |
| 5.6 | 67.75% | 66.77% | 2.0389  | 0.483  |
| 5.7 | 60.79% | 75.80% | 2.5117  | 0.5173 |
| 5.8 | 51.95% | 82.89% | 3.0362  | 0.5797 |
| 5.9 | 44.87% | 87.95% | 3.7254  | 0.6268 |
| 6.0 | 37.49% | 91.92% | 4.6374  | 0.6801 |
| 6.1 | 31.48% | 94.68% | 5.9196  | 0.7236 |
| 6.2 | 26.78% | 96.47% | 7.5958  | 0.759  |
| 6.3 | 22.61% | 97.54% | 9.1841  | 0.7934 |
| 6.4 | 19.32% | 98.22% | 10.8351 | 0.8215 |
| 6.5 | 16.60% | 98.72% | 13.0069 | 0.8448 |
| 6.6 | 14.50% | 99.07% | 15.5563 | 0.8631 |
| 6.7 | 12.59% | 99.33% | 18.8238 | 0.88   |
| 6.8 | 10.90% | 99.49% | 21.5245 | 0.8955 |
| 6.9 | 9.64%  | 99.62% | 25.0418 | 0.9071 |
| 7.0 | 8.53%  | 99.63% | 22.7595 | 0.9181 |
| 7.1 | 7.38%  | 99.70% | 24.2939 | 0.929  |
| 7.2 | 6.31%  | 99.73% | 23.0768 | 0.9394 |
| 7.3 | 5.59%  | 99.75% | 22.0532 | 0.9465 |
| 7.4 | 4.86%  | 99.78% | 21.7995 | 0.9535 |
| 7.5 | 4.32%  | 99.80% | 21.3355 | 0.9587 |
| 7.6 | 4.02%  | 99.80% | 19.8251 | 0.9618 |
| 7.7 | 3.75%  | 99.82% | 20.5587 | 0.9643 |
| 7.8 | 3.56%  | 99.82% | 19.5098 | 0.9662 |
| 7.9 | 3.33%  | 99.82% | 18.2511 | 0.9685 |
| 8.0 | 3.29%  | 99.82% | 18.0413 | 0.9689 |
| 8.1 | 3.14%  | 99.84% | 19.3536 | 0.9702 |
| 8.2 | 3.06%  | 99.84% | 18.8815 | 0.971  |
| 8.3 | 2.68%  | 99.84% | 16.5214 | 0.9748 |
| 8.4 | 2.56%  | 99.84% | 15.8133 | 0.976  |
| 8.5 | 2.49%  | 99.84% | 15.3413 | 0.9767 |

|      |       |         |         |        |
|------|-------|---------|---------|--------|
| 8.6  | 2.45% | 99.86%  | 17.2625 | 0.9769 |
| 8.7  | 2.30% | 99.86%  | 16.1836 | 0.9784 |
| 8.8  | 2.18% | 99.86%  | 15.3745 | 0.9796 |
| 8.9  | 2.10% | 99.87%  | 15.9763 | 0.9803 |
| 9.0  | 1.95% | 99.87%  | 14.8144 | 0.9818 |
| 9.1  | 1.91% | 99.87%  | 14.5239 | 0.9822 |
| 9.2  | 1.80% | 99.87%  | 13.6525 | 0.9833 |
| 9.3  | 1.76% | 99.87%  | 13.362  | 0.9837 |
| 9.5  | 1.72% | 99.87%  | 13.0715 | 0.9841 |
| 9.7  | 1.64% | 99.87%  | 12.4906 | 0.9848 |
| 9.8  | 1.45% | 99.87%  | 11.0382 | 0.9868 |
| 9.9  | 1.38% | 99.87%  | 10.4572 | 0.9875 |
| 10.0 | 1.38% | 99.89%  | 12.3588 | 0.9873 |
| 10.1 | 1.26% | 99.90%  | 12.4619 | 0.9884 |
| 10.3 | 1.19% | 99.91%  | 13.0065 | 0.989  |
| 10.4 | 1.15% | 99.94%  | 18.8813 | 0.9891 |
| 10.5 | 1.03% | 99.96%  | 25.4865 | 0.9901 |
| 10.6 | 0.96% | 99.96%  | 23.5986 | 0.9908 |
| 10.8 | 0.84% | 99.96%  | 20.7668 | 0.992  |
| 10.9 | 0.77% | 99.96%  | 18.8789 | 0.9928 |
| 11.0 | 0.65% | 99.96%  | 16.047  | 0.9939 |
| 11.2 | 0.61% | 99.97%  | 20.1375 | 0.9942 |
| 11.3 | 0.57% | 99.97%  | 18.8789 | 0.9946 |
| 11.5 | 0.54% | 99.97%  | 17.6203 | 0.9949 |
| 11.8 | 0.50% | 99.97%  | 16.3617 | 0.9953 |
| 11.9 | 0.46% | 99.97%  | 15.1031 | 0.9957 |
| 12.1 | 0.42% | 99.97%  | 13.8445 | 0.9961 |
| 12.2 | 0.38% | 99.97%  | 12.5859 | 0.9965 |
| 12.7 | 0.34% | 99.97%  | 11.3273 | 0.9969 |
| 12.8 | 0.34% | 99.98%  | 16.9974 | 0.9968 |
| 12.9 | 0.31% | 99.98%  | 15.1088 | 0.9971 |
| 13.0 | 0.23% | 99.98%  | 11.3316 | 0.9979 |
| 13.5 | 0.15% | 99.98%  | 7.5544  | 0.9987 |
| 13.6 | 0.15% | 100.00% | 0.9985  |        |
| 14.0 | 0.08% | 100.00% | 0.9992  |        |
| 15.7 | 0.04% | 100.00% | 0.9996  |        |
| 15.7 | 0.00% | 100.00% | 1       |        |



## NHANES III Subsample

### Sensitivity, specificity, likelihood ratio positive, and likelihood ratio negative for HbA1c cut-points

#### Prevalent Diabetes: Definition 1

| Cutpoint | Sensitivity | Specificity | LR+      | LR-    |
|----------|-------------|-------------|----------|--------|
| 3.8      | 100.00%     | 0.00%       | 1        |        |
| 4.0      | 100.00%     | 0.30%       | 1.003    | 0      |
| 4.1      | 100.00%     | 0.76%       | 1.0076   | 0      |
| 4.2      | 100.00%     | 1.06%       | 1.0107   | 0      |
| 4.3      | 100.00%     | 1.51%       | 1.0153   | 0      |
| 4.4      | 100.00%     | 1.81%       | 1.0185   | 0      |
| 4.5      | 100.00%     | 3.02%       | 1.0312   | 0      |
| 4.6      | 100.00%     | 4.83%       | 1.0508   | 0      |
| 4.7      | 100.00%     | 7.40%       | 1.0799   | 0      |
| 4.8      | 100.00%     | 11.03%      | 1.1239   | 0      |
| 4.9      | 100.00%     | 17.67%      | 1.2147   | 0      |
| 5.0      | 100.00%     | 21.75%      | 1.278    | 0      |
| 5.1      | 96.55%      | 29.00%      | 1.3599   | 0.1189 |
| 5.2      | 96.55%      | 37.01%      | 1.5328   | 0.0932 |
| 5.3      | 96.55%      | 43.96%      | 1.7228   | 0.0784 |
| 5.4      | 96.55%      | 53.17%      | 2.0618   | 0.0649 |
| 5.5      | 93.10%      | 62.84%      | 2.5055   | 0.1097 |
| 5.6      | 93.10%      | 68.88%      | 2.992    | 0.1001 |
| 5.7      | 93.10%      | 75.68%      | 3.8282   | 0.0911 |
| 5.8      | 93.10%      | 82.33%      | 5.2679   | 0.0838 |
| 5.9      | 89.66%      | 87.16%      | 6.9826   | 0.1187 |
| 6.0      | 82.76%      | 90.63%      | 8.8365   | 0.1902 |
| 6.1      | 82.76%      | 92.45%      | 10.9572  | 0.1865 |
| 6.2      | 79.31%      | 94.71%      | 15.001   | 0.2184 |
| 6.3      | 75.86%      | 96.22%      | 20.0883  | 0.2509 |
| 6.4      | 68.97%      | 97.13%      | 24.0291  | 0.3195 |
| 6.5      | 62.07%      | 98.04%      | 31.6074  | 0.3869 |
| 6.6      | 58.62%      | 98.94%      | 55.4383  | 0.4182 |
| 6.7      | 58.62%      | 99.09%      | 64.6784  | 0.4176 |
| 6.8      | 55.17%      | 99.70%      | 182.6243 | 0.4496 |
| 6.9      | 51.72%      | 99.85%      | 342.4206 | 0.4835 |
| 7.1      | 48.28%      | 99.85%      | 319.5926 | 0.518  |
| 7.3      | 44.83%      | 99.85%      | 296.7646 | 0.5526 |
| 7.4      | 41.38%      | 99.85%      | 273.9365 | 0.5871 |
| 7.5      | 37.93%      | 99.85%      | 251.1085 | 0.6216 |
| 7.6      | 34.48%      | 99.85%      | 228.2804 | 0.6562 |

|      |        |         |        |
|------|--------|---------|--------|
| 8.0  | 31.03% | 100.00% | 0.6897 |
| 8.9  | 27.59% | 100.00% | 0.7241 |
| 9.5  | 24.14% | 100.00% | 0.7586 |
| 9.7  | 20.69% | 100.00% | 0.7931 |
| 10.0 | 17.24% | 100.00% | 0.8276 |
| 10.7 | 10.34% | 100.00% | 0.8966 |
| 11.8 | 6.90%  | 100.00% | 0.931  |
| 12.1 | 3.45%  | 100.00% | 0.9655 |
| 12.1 | 0.00%  | 100.00% | 1      |

**Prevalent Diabetes: Definition 2**

| <b>Cutpoint</b> | <b>Sensitivity</b> | <b>Specificity</b> | <b>LR+</b> | <b>LR-</b> |
|-----------------|--------------------|--------------------|------------|------------|
| 3.8             | 100.00%            | 0.00%              | 1          |            |
| 4.0             | 100.00%            | 0.30%              | 1.003      | 0          |
| 4.1             | 100.00%            | 0.75%              | 1.0075     | 0          |
| 4.2             | 100.00%            | 1.04%              | 1.0106     | 0          |
| 4.3             | 100.00%            | 1.49%              | 1.0152     | 0          |
| 4.4             | 100.00%            | 1.79%              | 1.0182     | 0          |
| 4.5             | 100.00%            | 2.99%              | 1.0308     | 0          |
| 4.6             | 100.00%            | 4.78%              | 1.0502     | 0          |
| 4.7             | 100.00%            | 7.31%              | 1.0789     | 0          |
| 4.8             | 100.00%            | 10.90%             | 1.1223     | 0          |
| 4.9             | 100.00%            | 17.46%             | 1.2116     | 0          |
| 5.0             | 100.00%            | 21.49%             | 1.2738     | 0          |
| 5.1             | 95.24%             | 28.66%             | 1.3349     | 0.1662     |
| 5.2             | 95.24%             | 36.57%             | 1.5014     | 0.1302     |
| 5.3             | 95.24%             | 43.43%             | 1.6836     | 0.1096     |
| 5.4             | 95.24%             | 52.54%             | 2.0066     | 0.0906     |
| 5.5             | 90.48%             | 62.09%             | 2.3866     | 0.1534     |
| 5.6             | 90.48%             | 68.06%             | 2.8327     | 0.1399     |
| 5.7             | 90.48%             | 74.78%             | 3.5869     | 0.1274     |
| 5.8             | 90.48%             | 81.34%             | 4.8495     | 0.1171     |
| 5.9             | 85.71%             | 86.12%             | 6.1751     | 0.1659     |
| 6.0             | 76.19%             | 89.55%             | 7.2925     | 0.2659     |
| 6.1             | 76.19%             | 91.34%             | 8.8013     | 0.2607     |
| 6.2             | 76.19%             | 93.73%             | 12.1542    | 0.254      |
| 6.3             | 76.19%             | 95.37%             | 16.467     | 0.2496     |
| 6.4             | 76.19%             | 96.57%             | 22.1946    | 0.2466     |
| 6.5             | 71.43%             | 97.61%             | 29.9107    | 0.2927     |
| 6.6             | 66.67%             | 98.51%             | 44.6666    | 0.3384     |
| 6.7             | 66.67%             | 98.66%             | 49.6296    | 0.3379     |
| 6.8             | 61.90%             | 99.25%             | 82.9523    | 0.3838     |
| 6.9             | 57.14%             | 99.40%             | 95.7142    | 0.4311     |
| 7.1             | 57.14%             | 99.55%             | 127.619    | 0.4305     |

|      |        |         |          |        |
|------|--------|---------|----------|--------|
| 7.3  | 52.38% | 99.55%  | 116.984  | 0.4783 |
| 7.4  | 52.38% | 99.70%  | 175.4761 | 0.4776 |
| 7.5  | 52.38% | 99.85%  | 350.9521 | 0.4769 |
| 7.6  | 47.62% | 99.85%  | 319.0474 | 0.5246 |
| 8.0  | 42.86% | 100.00% | 0.5714   |        |
| 8.9  | 38.10% | 100.00% | 0.619    |        |
| 9.5  | 33.33% | 100.00% | 0.6667   |        |
| 9.7  | 28.57% | 100.00% | 0.7143   |        |
| 10.0 | 23.81% | 100.00% | 0.7619   |        |
| 10.7 | 14.29% | 100.00% | 0.8571   |        |
| 11.8 | 9.52%  | 100.00% | 0.9048   |        |
| 12.1 | 4.76%  | 100.00% | 0.9524   |        |
| 12.1 | 0.00%  | 100.00% | 1        |        |
